# Supplementary material for: Distribution and Relative Abundance of Bean Leaf Beetles (Ootheca spp.) (Insecta: Coleoptera: Chrysomelidae) in Uganda
Source: MDPI journal article supplement (doi:10.3390/insects12111048), 2021-11-22
Supplement: s1 [file s1]

# Distribution and Relative Abundance of Bean Leaf Beetles (*Ootheca* spp.) (Insecta: Coleoptera: Chrysomelidae) in Uganda

Charles Halerimana<sup>1,2</sup>, Samuel Kyamanywa<sup>1</sup>, Samuel Olaboro<sup>3</sup>, Pamela Paparu<sup>3</sup>, Stanley T. Nkalubo<sup>3</sup>, John Colvin<sup>4</sup>, Robert A. Cheke<sup>4</sup>, Thomas Wagner<sup>5</sup>, Susan E. Seal<sup>4</sup>, Darren J. Kriticos<sup>6,7</sup> and Michael H. Otim<sup>3,\*</sup>

<sup>1</sup>Department of Agricultural production, College of Agricultural and Environmental Sciences, Makerere University, P.O.Box, 7062, Kampala, Uganda, chahalerimana@gmail.com (C.H); skyamanywa@gmail.com (S.K)

<sup>2</sup>National Coffee Research Institute, P.O.Box, 185, Mukono, Uganda, chahalerimana@gmail.com (C.H)

<sup>3</sup>National Crops Resources Research Institute, P.O.Box, 7084, Kampala, Uganda, motim9405@gmail.com (M.H.O); pamela.paparu@gmail.com (P.P); tamusange@gmail.com (S.T.N); olasamuel94@gmail.com(S.O)

<sup>4</sup>Natural Resources Institute, University of Greenwich at Medway, Central Avenue, Chatham Maritime, Kent ME4 4TB, United Kingdom, S.E.Seal@greenwich.ac.uk (S.E.S); J.Colvin@greenwich.ac.uk (J.C); R.A.Cheke@greenwich.ac.uk (R.A.C)

<sup>5</sup>Universität Koblenz-Landau, Institut für Integrierte Naturwissenschaften – Biologie, Universitätstrasse 1, 56070 Koblenz, Germany, thwagner@uni-koblenz.de (T.W)

<sup>6</sup>Commonwealth Scientific and Industrial Research Organization GPO 1700, Canberra, 2601, Australia, Darren.Kriticos@csiro.au (D.J.K)

<sup>7</sup>School of Biology, University of Queensland, 4072 Brisbane, Australia, Darren.Kriticos@csiro.au (D.J.K)

Corresponding author. Michael H. Otim

National Agricultural Research Organization

National Crops Resources Research Institute (NaCRRI) Namulonge

P.O. Box, 7084, Kampala, Uganda

Telephone: +256772897040

Email: motim9405@gmail.com

**Table S1.** Weather variables of the sampled agro-ecological zones during the sampling period [18].

| Season | Month | Agro-ecological zones    |         |          |                     |         |          |                        |         |          |                                                      |         |          |                                       |         |          |                        |         |          |
|--------|-------|--------------------------|---------|----------|---------------------|---------|----------|------------------------|---------|----------|------------------------------------------------------|---------|----------|---------------------------------------|---------|----------|------------------------|---------|----------|
|        |       | Northern Moist Farmlands |         |          | West Nile Farmlands |         |          | Central Wooded Savanna |         |          | Western Mid-Altitude Farmlands and the Semliki Flats |         |          | Southern and Eastern Lake Kyoga Basin |         |          | Southwestern Highlands |         |          |
|        |       | Temp (°C)                | R/H (%) | R/F (mm) | Temp (°C)           | R/H (%) | R/F (mm) | Temp (°C)              | R/H (%) | R/F (mm) | Temp (°C)                                            | R/H (%) | R/F (mm) | Temp (°C)                             | R/H (%) | R/F (mm) | Temp (°C)              | R/H (%) | R/F (mm) |
| 2016A  | Apr   | 25.0                     | 71.0    | 219.7    | 24.3                | 67.5    | 234.0    | 23.7                   | 72.5    | 122.2    | 22.2                                                 | 85.5    | 168.8    | 24.8                                  | 65.0    | 178.3    | 19.5                   | 85.5    | 199.0    |
|        | May   | 24.6                     | 70.0    | 228.7    | 23.4                | 69.5    | 143.0    | 24.4                   | 72.0    | 105.5    | 22.2                                                 | 76.0    | 19.6     | 24.2                                  | 71.0    | 128.7    | 19.4                   | 80.5    | 81.0     |
|        | Jun   | 24.5                     | 66.0    | 92.4     | 23.0                | 68.0    | 68.4     | 22.8                   | 66.0    | 61.9     | 21.6                                                 | 65.5    | 18.7     | 24.2                                  | 64.0    | 63.6     | 18.0                   | 74.0    | 33.0     |
|        | Mean  | 24.7                     | 69.0    | 180.3    | 23.5                | 68.3    | 148.5    | 23.6                   | 70.2    | 96.5     | 22.0                                                 | 75.7    | 69.0     | 24.4                                  | 66.7    | 123.5    | 18.9                   | 80.0    | 105.0    |
| 2016B  | Jul   | 23.5                     | 71.5    | 204.3    | 22.0                | 74.0    | 173.7    | 22.1                   | 71.0    | 71.1     | 21.9                                                 | 66.5    | 6.2      | 23.6                                  | 67.0    | 32.3     | 18.0                   | 68.5    | 19.0     |
|        | Aug   | 23.9                     | 68.0    | 72.7     | 22.1                | 71.0    | 71.1     | 22.9                   | 71.0    | 87.8     | 21.9                                                 | 64.0    | 7.0      | 23.7                                  | 65.5    | 100.9    | 18.4                   | 64.0    | 43.0     |
|        | Sep   | 23.9                     | 65.0    | 119.6    | 22.4                | 70.5    | 171.5    | 22.8                   | 71.5    | 142.7    | 21.9                                                 | 67.0    | 29.6     | 24.0                                  | 62.0    | 121.2    | 19.1                   | 71.5    | 184.0    |
|        | Oct   | 23.1                     | 60.5    | 143.4    | 22.5                | 67.5    | 155.9    | 23.2                   | 68.5    | 290.8    | 22.2                                                 | 71.0    | 59.0     | 24.3                                  | 60.5    | 137.5    | 18.7                   | 76.0    | 130.0    |
|        | Nov   | 23.7                     | 59.0    | 59.3     | 23.0                | 63.5    | 98.4     | 23.7                   | 67.0    | 101.6    | 22.0                                                 | 79.0    | 112.1    | 24.4                                  | 57.5    | 134.3    | 18.3                   | 79.5    | 124.0    |
|        | Dec   | 24.7                     | 44.0    | 0.0      | 23.8                | 50.5    | 0.0      | 24.3                   | 51.5    | 34.9     | 21.4                                                 | 76.5    | 65.4     | 25.5                                  | 40.5    | 5.7      | 18.1                   | 75.5    | 24.0     |
|        | Mean  | 23.8                     | 61.3    | 99.9     | 22.6                | 66.2    | 111.8    | 23.1                   | 66.8    | 121.5    | 21.9                                                 | 70.7    | 46.6     | 24.3                                  | 58.8    | 88.7     | 18.4                   | 72.5    | 87.0     |
|        | Mean  | 23.8                     | 61.3    | 99.9     | 22.6                | 66.2    | 111.8    | 23.1                   | 66.8    | 121.5    | 21.9                                                 | 70.7    | 46.6     | 24.3                                  | 58.8    | 88.7     | 18.4                   | 72.5    | 87.0     |
| 2017A  | Jan   | 26.7                     | 32.5    | 3.3      | 25.0                | 42.0    | 1.0      | 25.3                   | 43.5    | 6.1      | 21.1                                                 | 67.5    | 52.3     | 26.3                                  | 41.0    | 18.9     | 18.7                   | 69.5    | 41.0     |
|        | Feb   | 26.6                     | 46.0    | 34.6     | 25.3                | 48.0    | 14.3     | 25.5                   | 54.0    | 92.8     | 23.1                                                 | 77.5    | 132.0    | 26.1                                  | 49.5    | 147.2    | 18.4                   | 77.0    | 50.0     |
|        | Mar   | 26.3                     | 62.5    | 181.8    | 25.5                | 54.5    | 99.7     | 25.0                   | 59.5    | 112.5    | 22.3                                                 | 79.5    | 166.8    | 25.2                                  | 60.0    | 90.4     | 18.3                   | 80.5    | 115.0    |
|        | Apr   | 26.4                     | 60.5    | 151.9    | 24.2                | 62.5    | 129.4    | 24.8                   | 63.5    | 113.3    | 22.0                                                 | 81.0    | 154.6    | 25.1                                  | 60.0    | 155.7    | 18.1                   | 81.0    | 72.0     |
|        | May   | 25.1                     | 70.5    | 138.1    | 23.4                | 67.0    | 128.0    | 24.1                   | 69.0    | 130.6    | 21.8                                                 | 83.0    | 93.8     | 23.4                                  | 70.0    | 150.6    | 17.9                   | 80.5    | 76.0     |
|        | Jun   | 25.4                     | 66.5    | 166.1    | 22.9                | 69.0    | 146.4    | 23.7                   | 68.5    | 253.1    | 20.5                                                 | 75.5    | 20.1     | 23.9                                  | 65.5    | 55.1     | 18.0                   | 70.0    | 5.0      |
|        | Mean  | 26.1                     | 56.4    | 112.6    | 24.4                | 57.2    | 86.5     | 24.7                   | 59.7    | 118.1    | 21.8                                                 | 77.3    | 103.3    | 25.0                                  | 57.7    | 102.9    | 18.2                   | 76.4    | 60.0     |

Key: 2016A = 2016 first rains, 2016B = 2016 second rains, 2017A = 2017 first rains. Temp = temperature, R/F = rainfall, R/H = relative humidity. Temperatures presented are the averages of maximum and minimum temperatures of each month. Relative humidity presented is the average of humidity at 9 am and 3pm for each month.

**Table S2.** The breakdown of genera or species categorized under others in Table 2

| Genera/Species                  | Agro-ecological zone |      |     |     |     |     | Mean |
|---------------------------------|----------------------|------|-----|-----|-----|-----|------|
|                                 | NMF                  | WNF  | CWS | WFL | SWH | SEK |      |
| <i>Buphonella</i>               | 0                    | 0    | 6.1 | 0   | 0   | 0   | 1.0  |
| <i>Parasbecesta ruwensorica</i> | 0.8                  | 1.4  | 0   | 0   | 0   | 0   | 0.4  |
| <i>Exosoma pecipenis</i>        | 0                    | 1.2  | 0   | 1.2 | 0   | 0   | 0.4  |
| <i>Neobarombiella</i>           | 0                    | 0    | 3.8 | 0   | 0   | 0   | 0.6  |
| <i>Afrothralma</i>              | 0                    | 0    | 2.6 | 0.6 | 0   | 0   | 0.5  |
| <i>Chrysochrus</i>              | 0.6                  | 0.08 | 0   | 0   | 0   | 0   | 0.1  |
| <i>Exosoma</i>                  | 0                    | 1.2  | 0   | 0.8 | 0   | 0   | 0.3  |
| <i>Lamprocopa</i>               | 0.06                 | 3.0  | 0   | 0.6 | 0   | 0   | 0.6  |
| <i>Plagiodera</i>               | 0.5                  | 0    | 0   | 0   | 0   | 0   | 0.08 |

Key: NMF = Northern Moist Farmlands, WNF = West Nile Farmlands, CWS = Central Wooded Savanna, WFL = Western Mid-Altitude Farmlands and the Semliki Flats, SWH = Southwestern Highlands, SEK = Southern and Eastern Lake Kyoga Basin

**Table S3.** Foliar damage due to bean leaf beetles across seasons

| Season            | Foliar damage per plant ( $\pm$ SE) |
|-------------------|-------------------------------------|
| 2016 first rains  | 0.87 $\pm$ 0.05a                    |
| 2016 second rains | 0.79 $\pm$ 0.03a                    |
| 2017 first rains  | 0.87 $\pm$ 0.04a                    |

Within a column, values bearing the same letter are not significantly different at  $p = 0.05$

**Table S4.** Influence of different bean growth stages and reproductive phases (abbreviations are listed in Figure 7) on bean leaf beetle populations in Uganda

| Bean growth stage | Bean leaf beetles per plant ( $\pm$ SE) |
|-------------------|-----------------------------------------|
| V1                | 0.09 $\pm$ 0.02a                        |
| V2                | 0.10 $\pm$ 0.03a                        |
| V3                | 0.07 $\pm$ 0.02a                        |
| V4                | 0.09 $\pm$ 0.02a                        |
| V5                | 0.05 $\pm$ 0.02a                        |
| R1                | 0.13 $\pm$ 0.03a                        |
| R2                | 0.11 $\pm$ 0.03a                        |
| R3                | 0.11 $\pm$ 0.03a                        |
| R4                | 0.04 $\pm$ 0.02a                        |
| R5                | 0.04 $\pm$ 0.01a                        |
| R6                | 0.05 $\pm$ 0.02a                        |

Within a column, values bearing the same letter are not significantly different at  $p = 0.05$

**Table S5.** Influence of cropping systems on foliar damage in different agro-ecological zones in Uganda.

| Agro-ecological zone                                 | Foliar damage per plant ( $\pm$ SE) |                    |
|------------------------------------------------------|-------------------------------------|--------------------|
|                                                      | Monocrop                            | Intercrop          |
| Northern Moist Farmlands                             | 1.12 $\pm$ 0.07de                   | 1.19 $\pm$ 0.04e   |
| West Nile Farmlands                                  | 0.85 $\pm$ 0.07bcd                  | 0.95 $\pm$ 0.05cde |
| Central Wooded Savanna                               | 0.80 $\pm$ 0.11bcde                 | 0.89 $\pm$ 0.06cd  |
| Western Mid-Altitude Farmlands and the Semliki Flats | 0.21 $\pm$ 0.11a                    | 0.55 $\pm$ 0.06ab  |
| Southwestern Highlands                               | 0.52 $\pm$ 0.08ab                   | 0.54 $\pm$ 0.07ab  |
| Southern and Eastern Lake Kyoga Basin                | 0.76 $\pm$ 0.09bcd                  | 0.69 $\pm$ 0.07bc  |

Within a row, values bearing the same letter or letter combinations are not significantly different at  $p = 0.05$

**Table S6.** Influence of host plant density on bean leaf beetle populations and foliar damage across agro-ecological zones

| Agro-ecological zone                                 | Bean leaf beetles per plant ( $\pm$ SE) |                   | Foliar damage per plant ( $\pm$ SE) |                      |
|------------------------------------------------------|-----------------------------------------|-------------------|-------------------------------------|----------------------|
|                                                      | Low density                             | High density      | Low density                         | High density         |
| Northern Moist Farmlands                             | 0.14 $\pm$ 0.01b                        | 0.20 $\pm$ 0.06ab | 1.15 $\pm$ 0.04e                    | 1.40 $\pm$ 0.16de    |
| West Nile Farmlands                                  | 0.04 $\pm$ 0.01a                        | 0.05 $\pm$ 0.07ab | 0.92 $\pm$ 0.04cd                   | 0.90 $\pm$ 0.18abcde |
| Central Wooded Savanna                               | 0.08 $\pm$ 0.02ab                       | 0.08 $\pm$ 0.12ab | 0.87 $\pm$ 0.05cd                   | 1.02 $\pm$ 0.31abcde |
| Western Mid-Altitude Farmlands and the Semliki Flats | 0.07 $\pm$ 0.02ab                       | 0.25 $\pm$ 0.17ab | 0.46 $\pm$ 0.05a                    | 0.75 $\pm$ 0.43abcde |
| Southwestern Highlands                               | 0.02 $\pm$ 0.02a                        | 0.00 $\pm$ 0.12ab | 0.54 $\pm$ 0.05ab                   | 0.33 $\pm$ 0.30abcde |
| Southern and Eastern Lake Kyoga Basin                | 0.09 $\pm$ 0.02ab                       | 0.00 $\pm$ 0.06ab | 0.75 $\pm$ 0.05bc                   | 0.43 $\pm$ 0.17abc   |

Within a row, values bearing the same letter or letter combinations are not significantly different at  $p = 0.05$  for each category

**Table S7.** Effect of time of sampling on occurrence of bean leaf beetles

| Time of sampling                | Bean leaf beetles per plant ( $\pm$ SE) |
|---------------------------------|-----------------------------------------|
| Early morning hours (8-11 a.m.) | 0.06 $\pm$ 0.01a                        |
| Afternoon hours (12-3 p.m.)     | 0.09 $\pm$ 0.27a                        |
| Evening hours (4-5 p.m.)        | 0.10 $\pm$ 0.01a                        |

Within a column, values bearing the same letter are not significantly different at  $p = 0.05$

**Table S8.** Influence of crop history on bean leaf beetle populations and foliar damage across agro-ecological zones

| Agro-ecological zone                                 | Bean leaf beetles per plant ( $\pm$ SE) |                   | Foliar damage per plant ( $\pm$ SE) |                    |
|------------------------------------------------------|-----------------------------------------|-------------------|-------------------------------------|--------------------|
|                                                      | Host                                    | Non-host          | Host                                | Non-host           |
| Northern Moist Farmlands                             | 0.14 $\pm$ 0.03ab                       | 0.14 $\pm$ 0.01b  | 1.12 $\pm$ 0.08de                   | 1.18 $\pm$ 0.04e   |
| West Nile Farmlands                                  | 0.03 $\pm$ 0.04ab                       | 0.04 $\pm$ 0.02a  | 1.12 $\pm$ 0.11de                   | 0.88 $\pm$ 0.04cd  |
| Central Wooded Savanna                               | 0.05 $\pm$ 0.05ab                       | 0.09 $\pm$ 0.02ab | 0.71 $\pm$ 0.12abcd                 | 0.91 $\pm$ 0.06cd  |
| Western Mid-Altitude Farmlands and the Semliki Flats | 0.03 $\pm$ 0.03ab                       | 0.11 $\pm$ 0.03ab | 0.34 $\pm$ 0.08a                    | 0.57 $\pm$ 0.08ab  |
| Southwestern Highlands                               | 0.05 $\pm$ 0.03ab                       | 0.02 $\pm$ 0.02a  | 0.51 $\pm$ 0.09ab                   | 0.55 $\pm$ 0.06ab  |
| Southern and Eastern Lake Kyoga Basin                | 0.06 $\pm$ 0.03ab                       | 0.09 $\pm$ 0.02ab | 0.61 $\pm$ 0.09abc                  | 0.78 $\pm$ 0.07bcd |

Within a row, values bearing the same letter or letter combinations are not significantly different at  $p = 0.05$  for each category

**Table S9.** Influence of insecticide use history on bean leaf beetle populations and foliar damage across agro-ecological zones

| Agro-ecological zone                                 | Bean leaf beetles per plant ( $\pm$ SE) |                   | Foliar damage per plant ( $\pm$ SE) |                     |
|------------------------------------------------------|-----------------------------------------|-------------------|-------------------------------------|---------------------|
|                                                      | Used                                    | Not used          | Used                                | Not used            |
| Northern Moist Farmlands                             | 0.10 $\pm$ 0.02ab                       | 0.16 $\pm$ 0.01b  | 1.21 $\pm$ 0.07ef                   | 1.15 $\pm$ 0.04df   |
| West Nile Farmlands                                  | 0.04 $\pm$ 0.04ab                       | 0.04 $\pm$ 0.01a  | 0.91 $\pm$ 0.11bcdef                | 0.92 $\pm$ 0.04ce   |
| Central Wooded Savanna                               | 0.01 $\pm$ 0.06ab                       | 0.09 $\pm$ 0.02ab | 0.60 $\pm$ 0.16abcd                 | 0.91 $\pm$ 0.06cdef |
| Western Mid-Altitude Farmlands and the Semliki Flats | 0.00 $\pm$ 0.07ab                       | 0.08 $\pm$ 0.02ab | 0.60 $\pm$ 0.19abcdef               | 0.45 $\pm$ 0.05a    |
| Southwestern Highlands                               | 0.05 $\pm$ 0.06ab                       | 0.02 $\pm$ 0.02a  | 0.67 $\pm$ 0.17abcdef               | 0.52 $\pm$ 0.05ab   |
| Southern and Eastern Lake Kyoga Basin                | 0.08 $\pm$ 0.03ab                       | 0.09 $\pm$ 0.02ab | 0.77 $\pm$ 0.09abc                  | 0.69 $\pm$ 0.07abc  |

Within a row, values bearing the same letter or letter combinations are not significantly different at  $p = 0.05$  for each category

**Table S10.** Potential non-crop hosts of bean leaf beetles and their host agro-ecological zones

| Number | Species/subspecies name                                  | Family name   | Life form | Host agro-ecological zone    |
|--------|----------------------------------------------------------|---------------|-----------|------------------------------|
| 1      | <i>Abelmoschus esculentus</i> (L.) Moench                | Malvaceae     | herb      | NMF, WNF                     |
| 2      | <i>Abutilon hirtum</i> (Lam.) Sweet                      | Malvaceae     | herb      | NMF, SEK, WNF, CWS, SWH, WFL |
| 3      | <i>Abutilon mauritanum</i> (Jacq.) Medik.                | Malvaceae     | herb      | NMF, SEK, WNF, CWS, SWH, WFL |
| 4      | <i>Acalypha crenata</i> Hochst. ex A. Rich.              | Euphorbiaceae | herb      | NMF                          |
| 5      | <i>Acanthospermum hispidum</i> DC.                       | Asteraceae    | herb      | NMF                          |
| 6      | <i>Amaranthus dubius</i> Mart. ex Thell.                 | Amaranthaceae | herb      | NMF, SEK, WNF, CWS, SWH, WFL |
| 7      | <i>Amaranthus hybridus cruentus</i> (L.) Thell.          | Amaranthaceae | herb      | NMF, SEK, WNF, CWS, SWH, WFL |
| 8      | <i>Aspilia kotschyi</i> (Sch. Bip. ex Hochst.) Oliv.     | Asteraceae    | herb      | NMF, NWF                     |
| 9      | <i>Asystasia gangetica</i> (L.) T. Anderson              | Acanthaceae   | herb      | NMF                          |
| 10     | <i>Asystasia mysorensis</i> (Roth) T. Anderson           | Acanthaceae   | herb      | NMF, SEK                     |
| 11     | <i>Celosia trigyna</i> L.                                | Amaranthaceae | herb      | NMF, SEK, WNF                |
| 12     | <i>Clerodendrum umbellatum</i> Poir.                     | Verbanaceae   | herb      | NMF                          |
| 13     | <i>Combretum collinum</i> Fresen.                        | Combretaceae  | tree      | NMF                          |
| 14     | <i>Corchorus olitorius</i> L.                            | Tiliaceae     | herb      | NMF, WNF                     |
| 15     | <i>Crossandra subacaulis</i> C. B. Clarke                | Acanthaceae   | herb      | NMF, CWS                     |
| 16     | <i>Crotalaria</i> sp.                                    | Papilionaceae | herb      | NMF, SEK, WFL                |
| 17     | <i>Cyathula prostrata</i> (L.) Blume                     | Amaranthaceae | herb      | NMF, SEK                     |
| 18     | <i>Desmodium gangeticum</i> (L.) DC.                     | Papilionaceae | herb      | NMF, WNF                     |
| 19     | <i>Desmodium tortuosum</i> (Sw.) DC.                     | Papilionaceae | herb      | NMF, SEK, WNF                |
| 20     | <i>Dombeya burgessiae</i> Gerrard ex Harv.               | Sterculiaceae | shrub     | WFL                          |
| 21     | <i>Dyschoriste nagchana</i> (Nees) Bennet                | Acanthaceae   | herb      | NMF, SEK, WFL                |
| 22     | <i>Erlangea cordifolia</i> (Benth. ex Oliv.) S. Moore    | Asteraceae    | herb      | NMF                          |
| 23     | <i>Grewia mollis</i> Juss.                               | Tiliaceae     | shrub     | NMF                          |
| 24     | <i>Hibiscus acetosella</i> Welw. ex Hiern.               | Malvaceae     | herb      | NMF, SEK, WNF                |
| 25     | <i>Abelmoschus moschatus</i> Medik.                      | Malvaceae     | herb      | NMF, WNF                     |
| 26     | <i>Kosteletzkya adoensis</i> (Hochst. ex A. Rich.) Mast. | Malvaceae     | herb      | NMF, SEK, SWH                |
| 27     | <i>Leonotis nepetifolia</i> (L.) R. Br.                  | Lamiaceae     | herb      | NMF                          |
| 28     | <i>Lipia abyssinica</i> (Otto & A. Dietr.) Cufod.        | Verbenaceae   | herb      | NMF, SEK, WNF, CWS           |
| 29     | <i>Lippia woodii</i> Mold.                               | Verbenaceae   | herb      | NMF                          |

Table S10 Cont.

| Number | Species/subspecies name                                         | Family name    | Life form | Host agro-ecological zone    |
|--------|-----------------------------------------------------------------|----------------|-----------|------------------------------|
| 30     | <i>Micrococca mercurialis</i> (L.) Benth.                       | Euphorbiaceae  | herb      | NMF                          |
| 31     | <i>Oxygonum sinuatum</i> (Hochst. & Steud. ex Meisn.)<br>Dammer | Polygonaceae   | herb      | NMF                          |
| 32     | <i>Philenoptera laxiflora</i> (Guill. & Perr.) Roberty          | Papilionaceae  | tree      | NMF                          |
| 33     | <i>Senna obtusifolia</i> (L.) H. S. Irwin & Barneby             | Caesalpinaceae | herb      | NMF                          |
| 34     | <i>Sida alba</i> L.                                             | Malvaceae      | herb      | NMF, SEK, WNF, CWS, SWH, WFL |
| 35     | <i>Sida rhombifolia</i> L.                                      | Malvaceae      | herb      | NMF, SEK, WNF, CWS, SWH, WFL |
| 36     | <i>Synerdrella nodiflora</i> L. (Gaertn.)                       | Asteraceae     | herb      | NMF, SEK                     |
| 37     | <i>Trichodesma zeylanicum</i> (Burm. f.) R. Br.                 | Boraginaceae   | herb      | NMF                          |
| 38     | <i>Triumfetta macrophylla</i> K. Schum.                         | Tiliaceae      | herb      | NMF, SEK, WNF, CWS, SWH, WFL |
| 39     | <i>Triumfetta rhomboidea</i> Jacq.                              | Tiliaceae      | herb      | NMF, SEK, WNF, CWS, SWH, WFL |
| 40     | <i>Urena lobata</i> L.                                          | Malvaceae      | herb      | NMF, SEK, WNF, CWS, SWH, WFL |
| 41     | <i>Vernonia cinerea</i> (L.) Less.                              | Asteraceae     | herb      | NMF, SEK                     |

Key: NMF = Northern Moist Farmlands, WNF = West Nile Farmlands, CWS = Central Wooded Savanna, WFL = Western Mid-Altitude Farmlands and the Semliki Flats, SWH = Southwestern Highlands, SEK = Southern and Eastern Lake Kyoga Basin
